# Supplementary material for: Molecular Docking and Preclinical Study of Five-Membered S,S-Palladaheterocycle as Hepatoprotective Agent
Source: PubMed Central journal article supplement (PMC6912183; doi:10.15171/apb.2019.079), 2019-10-24
Supplement: apb-9-674-s001.pdf [file apb-9-674-s001.pdf]

# Molecular Docking and Preclinical Study of Five-Membered S,S-Palladaheterocycle as Hepatoprotective Agent

## Supplementary file 1

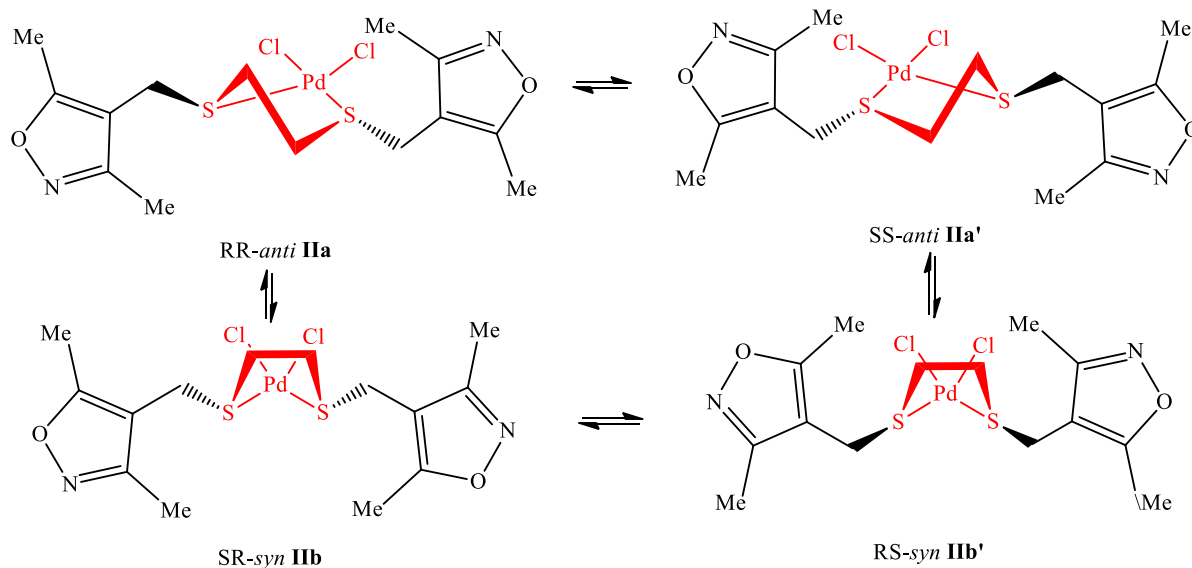

**Figure S1.** Diastereomers showing *syn*- and *anti*-isomerism of palladaheterocycle **II**.

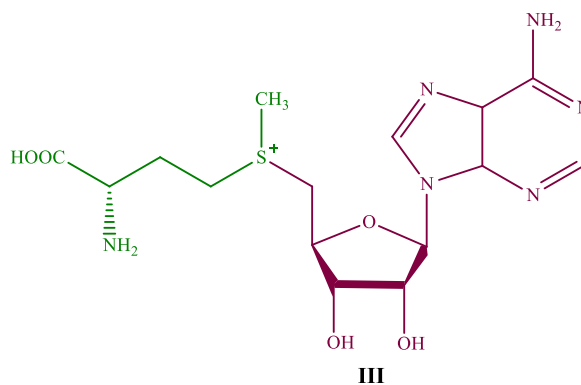

**Figure S2.** Structure of S-adenosylmethionine namely SAM **III**

**Table S1.** Molecular docking calculations of the enantiomers **IIa,a',b,b'** in the active center of cytochrome P450 2E1

| IIa with protein P450 2E1 |          |              | RS | IIb with protein P450 2E1 |          |              | SR | IIb" with protein P450 2E1 |      |       | SS | IIa" with protein P450 2E1 |      |       |
|---------------------------|----------|--------------|----|---------------------------|----------|--------------|----|----------------------------|------|-------|----|----------------------------|------|-------|
| "-ΔG"                     | xmean-xi | (xmean-xi)^2 |    |                           | xmean-xi | (xmean-xi)^2 |    |                            |      |       |    |                            |      |       |
| 3                         | 2.4      | 5.76         |    | 44                        | 7.2      | 51.84        |    | 31                         | 4.9  | 24.01 |    | 36                         | 5.1  | 26.01 |
| 2                         | 3.4      | 11.56        |    | 40                        | 3.2      | 10.24        |    | 29                         | 2.9  | 8.41  |    | 35                         | 4.1  | 16.81 |
| 8                         | -2.6     | 6.76         |    | 41                        | 4.2      | 17.64        |    | 30                         | 3.9  | 15.21 |    | 34                         | 3.1  | 9.61  |
| 6                         | -0.6     | 0.36         |    | 38                        | 1.2      | 1.44         |    | 30                         | 3.9  | 15.21 |    | 32                         | 1.1  | 1.21  |
| 3                         | 2.4      | 5.76         |    | 30                        | -6.8     | 46.24        |    | 24                         | -2.1 | 4.41  |    | 30                         | -0.9 | 0.81  |
| 4                         | 1.4      | 1.96         |    | 39                        | 2.2      | 4.84         |    | 25                         | -1.1 | 1.21  |    | 31                         | 0.1  | 0.01  |
| 9                         | -3.6     | 12.96        |    | 37                        | 0.2      | 0.04         |    | 24                         | -2.1 | 4.41  |    | 29                         | -1.9 | 3.61  |
| 4                         | 1.4      | 1.96         |    | 35                        | -1.8     | 3.24         |    | 23                         | -3.1 | 9.61  |    | 30                         | -0.9 | 0.81  |
| 6                         | -0.6     | 0.36         |    | 33                        | -3.8     | 14.44        |    | 22                         | -4.1 | 16.81 |    | 29                         | -1.9 | 3.61  |
| 9                         | -3.6     | 12.96        |    | 31                        | -5.8     | 33.64        |    | 23                         | -3.1 | 9.61  |    | 23                         | -7.9 | 62.41 |
| no blunders identified    |          |              |    | no blunders identified    |          |              |    | no blunders identified     |      |       |    | no blunders identified     |      |       |
| 54                        |          | 60.4         |    | 368                       |          |              |    | 261                        |      |       |    | 309                        |      |       |
| 5.4                       |          | 5.04         |    | 36.8                      |          |              |    | 26.1                       |      |       |    | 30.9                       |      |       |
| 60.4                      | S=       | 2.244994432  |    | 183.6                     |          |              |    | 108.9                      |      |       |    | 124.9                      |      |       |
| 6.711111111               | 3S=      | 6.734983296  |    | 20.4                      |          |              |    | 12.1                       |      |       |    | 13.87778                   |      |       |
| 2.59058123                |          |              |    | 4.516636                  |          |              |    | 3.478505                   |      |       |    | 3.725289                   |      |       |
| 7.771743691               | Dx=      | 1.604440837  |    | 13.54991                  |          |              |    | 10.43552                   |      |       |    | 11.17587                   |      |       |
| 2.26                      |          |              |    |                           |          |              |    |                            |      |       |    |                            |      |       |
| 1.851422996               |          |              |    | 3.227926                  |          | 37±3         |    | 2.486                      |      | 26±2  |    | 2.66237                    |      | 31±3  |

**Table S2.** Molecular docking calculations of the the enantiomers **IIa,a',b,b'** in the active center of cytochrome P450 2C9

| IIa with protein P450 2C9 |          |              | RS | IIb with protein P450 2C9 |          |              | SR | IIb" with protein P450 2C9 |    |        | SS | IIa" with protein P450 2C9 |       |        |
|---------------------------|----------|--------------|----|---------------------------|----------|--------------|----|----------------------------|----|--------|----|----------------------------|-------|--------|
| "-ΔG"                     | xmean-xi | (xmean-xi)^2 |    |                           | xmean-xi | (xmean-xi)^2 |    |                            |    |        |    |                            |       |        |
| 47                        | 9.1      | 82.81        |    | 48                        | 6        | 36           |    | 54                         | 12 | 144    |    | 37                         | 1.9   | 3.61   |
| 40                        | 2.1      | 4.41         |    | 44                        | 2        | 4            |    | 45                         | 3  | 9      |    | 35                         | -0.1  | 0.01   |
| 39                        | 1.1      | 1.21         |    | 44                        | 2        | 4            |    | 42                         | 0  | 0      |    | 35                         | -0.1  | 0.01   |
| 39                        | 1.1      | 1.21         |    | 40                        | -2       | 4            |    | 41                         | -1 | 1      |    | 34                         | -1.1  | 1.21   |
| 38                        | 0.1      | 0.01         |    | 36                        | -6       | 36           |    | 40                         | -2 | 4      |    | 35                         | -0.1  | 0.01   |
| 37                        | -0.9     | 0.81         |    | 47                        | 5        | 25           |    | 42                         | 0  | 0      |    | 33                         | -2.1  | 4.41   |
| 39                        | 1.1      | 1.21         |    | 39                        | -3       | 9            |    | 39                         | -3 | 9      |    | 25                         | -10.1 | 102.01 |
| 37                        | -0.9     | 0.81         |    | 43                        | 1        | 1            |    | 42                         | 0  | 0      |    | 44                         | 8.9   | 79.21  |
| 34                        | -3.9     | 15.21        |    | 42                        | 0        | 0            |    | 40                         | -2 | 4      |    | 36                         | 0.9   | 0.81   |
| 32                        | -5.9     | 34.81        |    | 37                        | -5       | 25           |    | 35                         | -7 | 49     |    | 37                         | 1.9   | 3.61   |
| no blunders identified    |          |              |    | no blunders identified    |          |              |    | no blunders identified     |    |        |    | no blunders identified     |       |        |
|                           |          |              |    |                           |          |              |    |                            |    |        |    |                            |       |        |
|                           |          |              |    | 420                       |          |              |    | 420                        |    |        |    | 351                        |       |        |
| 382                       |          | 142.5        |    | 42                        |          |              |    | 42                         |    |        |    | 35.1                       |       |        |
| 38.2                      |          | 13.25        |    | 144                       |          |              |    | 220                        |    |        |    | 194.9                      |       |        |
| 142.5                     | S=       | 3.640054945  |    | 16                        |          |              |    | 24.44444                   |    |        |    | 21.65556                   |       |        |
| 15.83333333               | 3S=      | 10.92016483  |    | 4                         |          |              |    | 4.944132                   |    |        |    | 4.653553                   |       |        |
| 3.979112129               |          |              |    | 12                        |          |              |    | 14.8324                    |    |        |    | 13.96066                   |       |        |
| 11.93733639               | Dx=      | 2.601455362  |    |                           |          |              |    |                            |    |        |    |                            |       |        |
| 2.26                      |          |              |    |                           |          |              |    |                            |    |        |    |                            |       |        |
| 2.843770971               |          |              |    | 2.858699                  |          | 42±3         |    | 3.533447                   |    | 42±3.5 |    | 3.325777                   |       | 35±3   |

**Table S3.** An impact of the palladaheterocycle **II** on a ten-day survival of animals in the modeling of toxic hepatitis

| Group                                                     | n initial amount | n <sub>10 day</sub> | Survival rates, % |
|-----------------------------------------------------------|------------------|---------------------|-------------------|
| Normal saline solution 0.2 mL/kg (intact group)           | 10               | 10                  | 100               |
| CCl <sub>4</sub> 0.3 mL/kg (control group)                | 10               | 4                   | 40                |
| SAM <b>III</b> 25 mg/kg i.p. + CCl <sub>4</sub> 0.3 mg/kg | 10               | 7                   | 70                |
| <b>II</b> 2.5 mg/kg i.p. CCl <sub>4</sub> 0.3 mg/kg       | 10               | 7                   | 70                |
| <b>II</b> 25 mg/kg i.p. CCl <sub>4</sub> 0.3 mg/kg        | 10               | 8                   | 80                |
| <b>II</b> 250 mg/kg i.p. CCl <sub>4</sub> 0.3 mg/kg       | 10               | 8                   | 80                |

Note: n<sub>initial amount</sub> – initial number of animals in the group; n<sub>10 day</sub>. – number of animals surviving for 10 days.

**Table S4.** An impact of the S,S-palladacycle **II** on pigment metabolism in induced toxic hepatitis

| Group                                  | Index | Total bilirubin.          | Conjugated bilirubin.     | Unconjugated bilirubin.   |
|----------------------------------------|-------|---------------------------|---------------------------|---------------------------|
|                                        |       | mkmol/L                   | mkmol/L                   | mkmol/L                   |
| Intact group CCl <sub>4</sub>          |       | 10.87±0.73                | 7.92±0.50                 | 2.95±0.45                 |
|                                        |       | 22.43±2.71 <sup>[1]</sup> | 8.69±1.43                 | 13.74±2.38 <sup>[1]</sup> |
| SAM 25mg/kg + CCl <sub>4</sub>         |       | 17.91±1.02                | 11.92±0.91                | 6.99±1.22 <sup>[2]</sup>  |
| <b>II</b> 2.5 mg/kg + CCl <sub>4</sub> |       | 17.89±0.94                | 12.70±1.03 <sup>[2]</sup> | 6.19±0.75 <sup>[2]</sup>  |
| <b>II</b> 25 mg/kg + CCl <sub>4</sub>  |       | 16.80±0.95                | 13.88±1.06 <sup>[2]</sup> | 3.92±0.65 <sup>[2]</sup>  |
| <b>II</b> 250 mg/kg + CCl <sub>4</sub> |       | 17.06±1.72                | 9.76±1.38                 | 9.30±1.46                 |

Note: [1] - statistically significant differences from the indices of a group of intact animals; [2] - statistically significant differences from the indices of the group "CCl<sub>4</sub>"
